# Supplementary material
Source: publisher site journal article supplement (https://www.dovepress.com/article/563462)
Supplement: Supplementary file 1 [file 563462%20Revised%20supplementary%20material.docx]

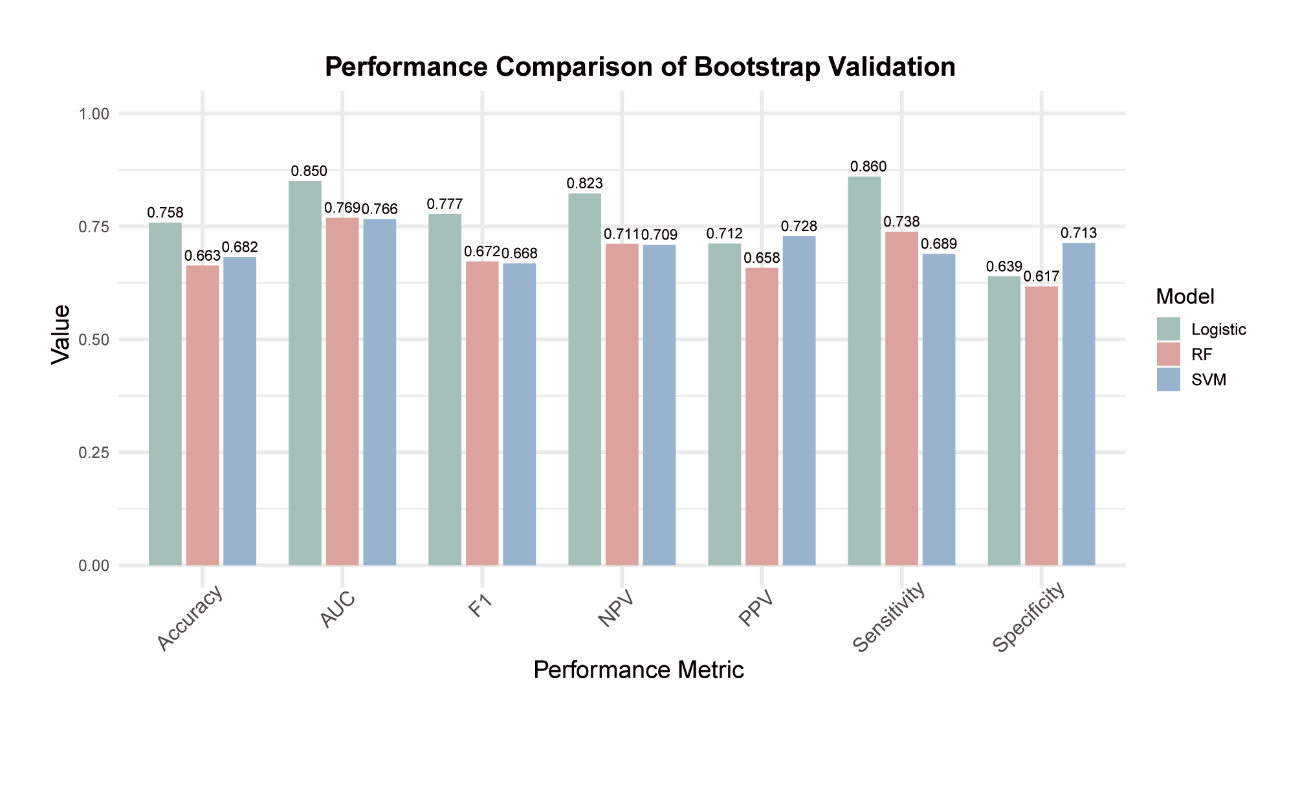


Supplementary Figure 1. Bootstrap validation of predictive performance for logistic regression, random forest, and SVM.

Bar plots illustrate classification metrics for each model—accuracy, AUC, F1 score, PPV, NPV, sensitivity, and specificity—across 500 bootstrap resamples. These internally validated results evaluate the stability and generalizability of the three models.

AUC, area under the curve; PPV, positive predictive value; NPV, negative predictive value; RF, random forest; SVM, support vector machine.


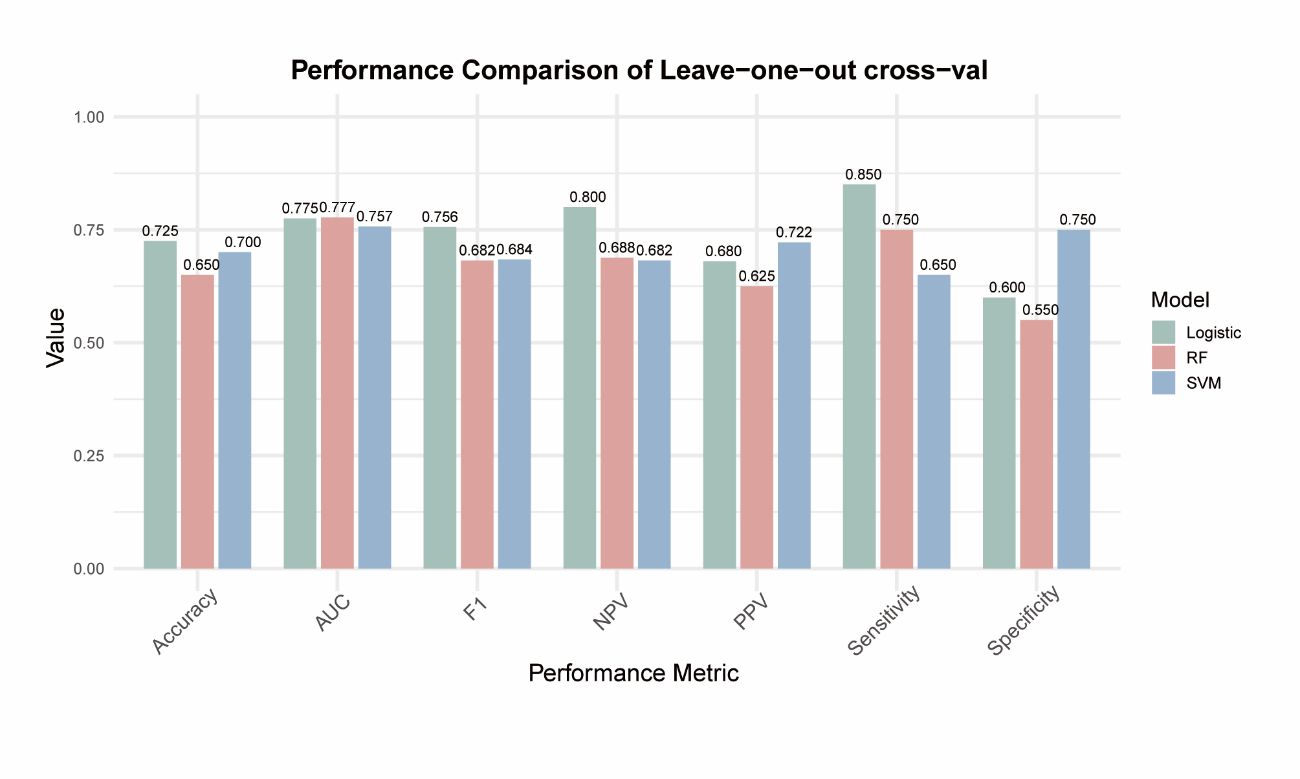


Supplementary Figure 2. Leave-one-out cross-validation (LOOCV) performance of logistic regression, random forest, and SVM models.

Bar plots illustrate classification metrics under LOOCV for each model—accuracy, AUC, F1 score, PPV, NPV, sensitivity, and specificity. LOOCV was applied to assess the generalizability and robustness of the models in a small-sample setting.

AUC, area under the curve; PPV, positive predictive value; NPV, negative predictive value; RF, random forest; SVM, support vector machine.


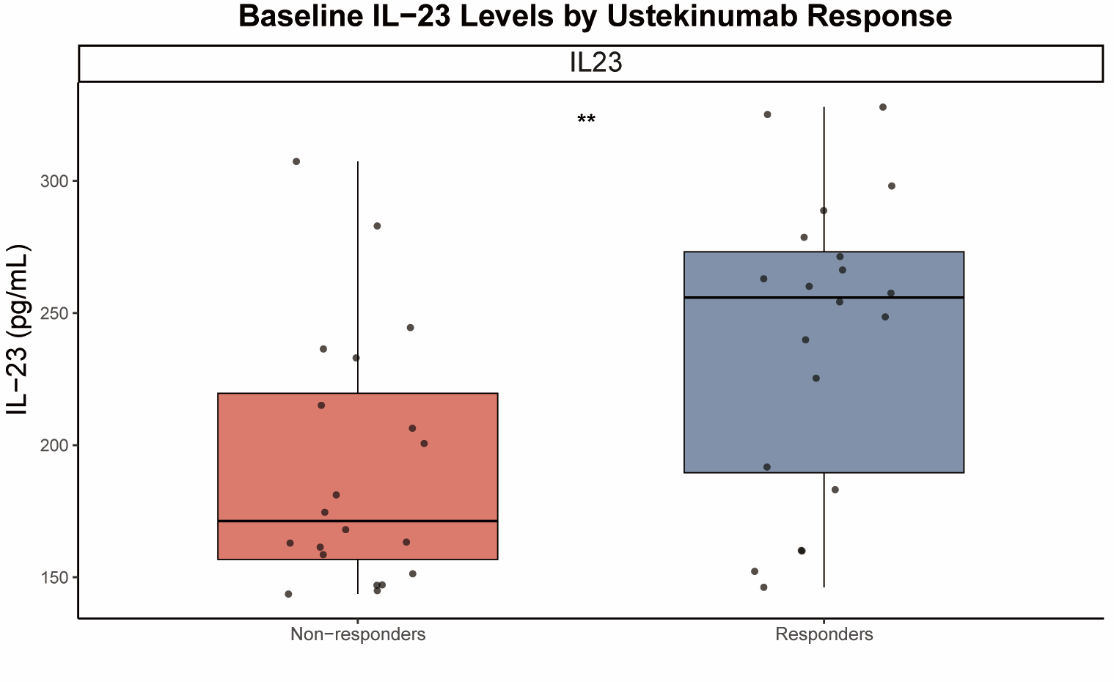


Supplementary Figure 3. Serum IL-23 concentrations measured by ELISA in responders and non-responders to ustekinumab.

Box plots show serum IL-23 concentrations in responders (n = 20) and non-responders (n = 20) measured using ELISA. **, P < 0.01.

Supplementary Table 1. Differentially expressed inflammation-related proteins between UST responders and non-responders, adjusted for confounding variables.

| Protein | UniProt | description | logFCa | *P* Valueb |
| --- | --- | --- | --- | --- |
| IL8 | P10145 | Interleukin-8 (IL-8) | 1.205 | 0.017 |
| TSLP | Q969D9 | Thymic stromal lymphopoietin | -0.842 | 0.023 |
| CD6 | P30203 | T-cell differentiation antigen CD6 | 0.693 | 0.041 |

aAdjusted fold change (FC) represents the log₂-transformed difference in protein expression between groups.

b*P* values were derived from moderated t-statistics based on the empirical Bayes approach. Only proteins with *P*< 0.05 are shown.

Supplementary Table 2. Differentially expressed inflammation-related proteins adjusted for confounders and prior biologic exposure.

| Protein | UniProt | description | logFCa | *P* Valueb |
| --- | --- | --- | --- | --- |
| IL8 | P10145 | Interleukin-8 (IL-8) | 1.443 | 0.005 |
| TSLP | Q969D9 | Thymic stromal lymphopoietin | -0.748 | 0.048 |
| CD6 | P30203 | T-cell differentiation antigen CD6 | 0.568 | 0.096 |
| IL5 | P05113 | Interleukin-5 (IL-5) | 0.964 | 0.039 |

aAdjusted fold change (FC) represents the log₂-transformed difference in protein expression between groups.

b*P* values were derived from moderated t-statistics based on the empirical Bayes approach. Only proteins with *P*< 0.05 are shown.

Supplementary Table 3. Demographic and clinical characteristics of the ELISA validation cohort

| **Characteristics** | **NR (n=10)** | **R(n=10)** | **Total (n=20)** | ***P* Value** |
| --- | --- | --- | --- | --- |
| Age (years), median (IQR) | 37.4 (26.7, 50.6) | 33.9 (31.9, 37.5) | 36.2 (30.1, 41.1) | 0.579 |
| Sex |  |  |  | >0.999 |
| Female (n, %) | 4 (40%) | 4 (40%) | 8 (40%) |  |
| Male (n, %) | 6 (60%) | 6 (60%) | 12 (60%) |  |
| Diagnosis age (n, %) |  |  |  | 0.582 |
| A2 | 7 (70%) | 9 (90%) | 16 (80%) |  |
| A3 | 3 (30%) | 1 (10%) | 4 (20%) |  |
| Disease behavior (n, %) |  |  |  | 0.057 |
| B1 | 6 (60%) | 1 (10%) | 7 (35%) |  |
| B2 | 4 (40%) | 9 (90%) | 13 (65%) |  |
| Disease location (n, %) |  |  |  | 0.650 |
| Ileal (L1) | 3 (30%) | 4 (40%) | 7 (35%) |  |
| Colonic (L2) | 2 (20%) | 0 (0%) | 2 (10%) |  |
| Ileocolonic (L3) | 5 (50%) | 6 (60%) | 11 (55%) |  |
| Perianal diseasea (n, %) |  |  |  | >0.999 |
| No | 5 (50%) | 5 (50%) | 10 (50%) |  |
| Yes | 5 (50%) | 5 (50%) | 10 (50%) |  |
| Bio_naive (n, %) |  |  |  | 0.650 |
| No | 3 (30%) | 5 (50%) | 8 (40%) |  |
| Yes | 7 (70%) | 5 (50%) | 12 (60%) |  |
| EIM (n, %) |  |  |  | >0.999 |
| No | 9 (90%) | 10 (100%) | 19 (95%) |  |
| Yes | 1 (10%) | 0 (0%) | 1 (5.0%) |  |
| Numberofbios (n, %) |  |  |  | 0.650 |
| 0 | 7 (70%) | 5 (50%) | 12 (60%) |  |
| 1 | 3 (30%) | 5 (50%) | 8 (40%) |  |
| Height(cm), Mean ± SD | 173.0 (166.0, 175.0) | 169.5 (164.0, 178.0) | 171.5 (165.5, 175.5) | >0.999 |
| Weight(kg), Mean ± SD | 52.0 (50.5, 63.5) | 58.0 (53.0, 62.0) | 56.5 (51.5, 62.3) | 0.427 |
| BMI (kg/m2), Mean ± SD | 18.6 (17.4, 20.7) | 19.8 (19.3, 20.7) | 19.5 (18.3, 20.7) | 0.247 |
| Diagnose months(months)Median (Q1, Q3) | 44.0 (31.0, 53.0) | 51.0 (39.0, 83.0) | 45.5 (35.0, 60.0) | 0.344 |
| CDAI, Mean ± SD | 161.3 (156.0, 174.2) | 130.7 (97.8, 181.3) | 158.3 (112.5, 177.8) | 0.315 |
| White Blood Cell(109/L), Mean ± SD | 5.0 (5.0, 8.6) | 4.6 (4.1, 6.7) | 5.0 (4.4, 7.3) | 0.288 |
| Platelet count(109/L), Median (Q1, Q3) | 234.5 (211.0, 331.0) | 220.0 (185.0, 238.0) | 231.5 (205.0, 308.5) | 0.406 |
| Haemoglobin level(g/L), Mean ± SD | 121.5 (109.0, 134.0) | 108.5 (90.0, 134.0) | 116.5 (98.5, 134.0) | 0.545 |
| Neutrophil, Median (Q1, Q3) | 3.8 (2.8, 6.1) | 2.5 (1.9, 3.3) | 3.1 (2.2, 4.0) | 0.082 |
| Macrophage, Median (Q1, Q3) | 0.1 (0.1, 0.2) | 0.1 (0.1, 0.2) | 0.1 (0.1, 0.2) | 0.909 |
| ESR，Median (Q1, Q3) | 23.5 (2.0, 40.0) | 13.5 (7.0, 19.5) | 18.5 (6.0, 36.0) | 0.859 |
| Total Bilirubin(μmol/L), Median (Q1, Q3) | 7.5 (3.8, 10.7) | 10.5 (6.3, 11.4) | 8.4 (5.7, 11.2) | 0.307 |
| Direct Bilirubin(μmol/L), Median (Q1, Q3) | 1.3 (1.0, 2.2) | 2.0 (1.3, 2.6) | 1.5 (1.0, 2.6) | 0.272 |
| Albumin(g/L), Median (Q1, Q3) | 41.2 (38.5, 44.4) | 40.3 (34.7, 41.8) | 40.8 (37.9, 42.6) | 0.280 |
| Serum Creatinine(μmol/L), Mean ± SD | 56.5 (45.0, 78.0) | 61.0 (51.0, 69.0) | 58.5 (49.0, 70.0) | 0.762 |
| CRP (mg/L), Median (Q1, Q3) | 8.3 (2.4, 15.4) | 5.6 (3.6, 8.6) | 5.6 (3.0, 11.0) | 0.364 |
| FC(μg/g), Median (Q1, Q3) | 875.4 (159.2, 1,000.0) | 695.1 (366.7, 1,000.0) | 805.5 (353.0, 1,000.0) | 0.938 |
| Baseline SES_CD, Median (Q1, Q3) | 13.0 (10.0, 20.0) | 11.0 (11.0, 15.0) | 11.5 (10.0, 15.5) | 0.909 |
| Post-treatment SES-CD, Median (Q1, Q3) | 3.5 (0.0, 5.0) | 9.5 (7.0, 15.0) | 6.0 (3.5, 9.5) | <0.001*** |

Data are presented as mean ± SD, median [IQR], or n (%), as appropriate. Continuous variables were compared using t-test or Mann–Whitney U test, and categorical variables using chi-square or Fisher’s exact test. Two-sided P < 0.05 was considered statistically significant. ***P < 0.001.

aPerianal disease was defined as inactive fistula, skin tags or anal fissures.

Bio_naive ：Biologic-naïve (patients without prior biologic therapy). Numberofbios: Number of prior biologic agents used before UST initiation. EIM, extraintestinal manifestations. A2, age at diagnosis between 17 and 40 years; A3: age at diagnosis >40 years. B1, non-stricturing, non-penetrating disease; B2, stricturing disease. BMI, body mass index; CDAI, Crohn’s Disease Activity Index; ESR, erythrocyte sedimentation rate; CRP, C-reactive protein; FC, fecal calprotectin; SES-CD, Simple Endoscopic Score for Crohn’s Disease (range: 0–60).
